# Supplementary material for: Study on the Performance and Corrosion Failure Process of Porous Titanium-Based Coated Electrodes
Source: MDPI journal article supplement (doi:10.3390/lubricants10110282), 2022-10-28
Supplement: s1 [file s1]

# Supporting Information

## Study on the Performance and Corrosion-failure Process of Po-rous-titanium-based Coated Electrode (lubricants-1959038)

Li Jiamin<sup>1,2</sup>, Chang Linhui<sup>1,2</sup>, Chen Bumng<sup>1,2,3,\*</sup>, Huang Hui<sup>1,2,3</sup> and Guo Zhongcheng<sup>1,2,3</sup>

1 Faculty of Metallurgical and Energy Engineering, Kunming University of Science and Technology, Kunming 650093, China;

2 Research Center of Metallurgical Electrode Materials Engineering Technology, Yunnan Province, Kunming 650106, China;

3 Kunming Hendera Science and Technology Co., Ltd., Kunming, 650106, China

\* Correspondence: Author: Bumng Chen; bumchen@kust.edu.cn

### Supplementary Figures and Tables

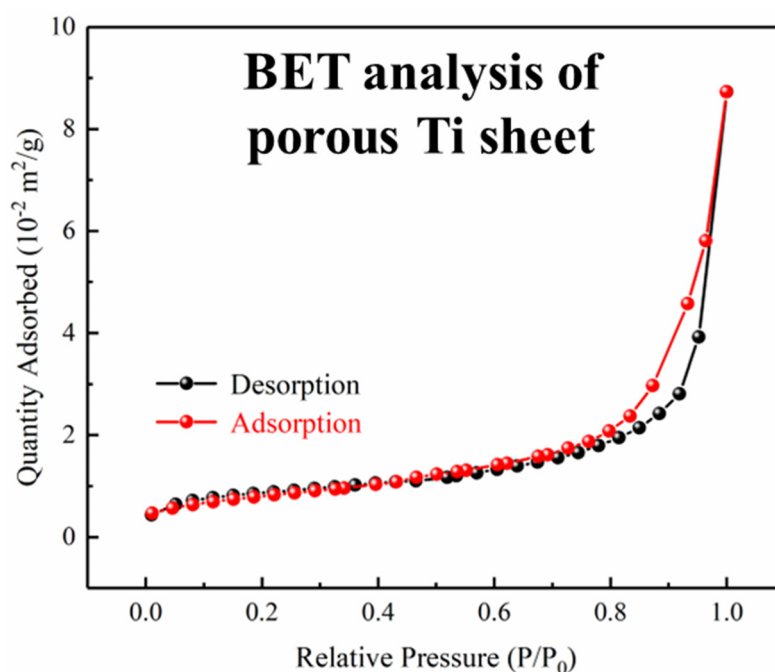

Figure S1. BET analysis of porous Ti-sheet.

According to the BET test results, the specific surface area of the porous titanium sheet is  $2.863 \times 10^{-2} \text{ m}^2/\text{g}$ .
