# Supplementary material for: Study on the Performance and Corrosion Failure Process of Porous Titanium-Based Coated Electrodes
Source: MDPI journal article supplement (doi:10.3390/lubricants10110282), 2022-10-28
Supplement: s1 [file s1]

Archive with 1 entries (1 files):
- lubricants-1959038-supplementary.pdf
